# Supplementary material for: The Influence of Textile Type, Textile Weight, and Detergent Dosage on Microfiber Emissions from Top-Loading Washing Machines
Source: MDPI journal article supplement (doi:10.3390/toxics12030210), 2024-03-12
Supplement: s1 [file s1]

## Supplementary materials

Table S1. The summarized of experimental results based on the effects of textile weight on MF emissions

| Textile weight (kg) | Detergent dosage (g/L) | CO (Particles/L) | CVC (Particles/L) | TC (Particles/L) | PES (Particles/L) | Average | Whole average |
|---------------------|------------------------|------------------|-------------------|------------------|-------------------|---------|---------------|
| 0.5                 | 0.35                   | 758              | 2230              | 2003             | 2127              | 1780    | 1975          |
|                     | 0.70                   | 529              | 3350              | 2240             | 2664              | 2196    |               |
|                     | 1.05                   | 2063             | 2643              | 1099             | 1996              | 1950    |               |
| 1.0                 | 0.35                   | 397              | 3712              | 4275             | 2030              | 2604    | 2692          |
|                     | 0.70                   | 1959             | 4134              | 3507             | 1999              | 2900    |               |
|                     | 1.05                   | 2135             | 3880              | 2207             | 2070              | 2573    |               |
| 1.5                 | 0.35                   | 5146             | 5363              | 3785             | 3300              | 4399    | 3978          |
|                     | 0.70                   | 3198             | 5397              | 3345             | 1878              | 3455    |               |
|                     | 1.05                   | 4326             | 5490              | 3136             | 3372              | 4081    |               |

Table S2. The summarized of experimental results based on the effects of detergent dosage on MF emissions

| Detergent dosage (g/L) | Textile weight (kg) | CO (Particles/L) | CVC (Particles/L) | TC (Particles/L) | PES (Particles/L) | Average | Whole average |
|------------------------|---------------------|------------------|-------------------|------------------|-------------------|---------|---------------|
| 0.35                   | 0.5                 | 758              | 2230              | 2003             | 2127              | 1780    | 2927          |
|                        | 1.0                 | 397              | 3712              | 4275             | 2030              | 2604    |               |
|                        | 1.5                 | 5146             | 5363              | 3785             | 3300              | 4399    |               |
| 0.70                   | 0.5                 | 529              | 3350              | 2240             | 2664              | 2196    | 2850          |
|                        | 1.0                 | 1959             | 4134              | 3507             | 1999              | 2900    |               |
|                        | 1.5                 | 3198             | 5397              | 3345             | 1878              | 3455    |               |
| 1.05                   | 0.5                 | 2063             | 2643              | 1099             | 1996              | 1950    | 2868          |
|                        | 1.0                 | 2135             | 3880              | 2207             | 2070              | 2573    |               |
|                        | 1.5                 | 4326             | 5490              | 3136             | 3372              | 4081    |               |
